# Supplementary material for: Pretreatment with Panaxatriol Saponin Attenuates Mitochondrial Apoptosis and Oxidative Stress to Facilitate Treatment of Myocardial Ischemia‐Reperfusion Injury via the Regulation of Keap1/Nrf2 Activity
Source: Hindawi journal article supplement (doi:10.1155/2022/9626703), 2022-01-01

Figure 1 F

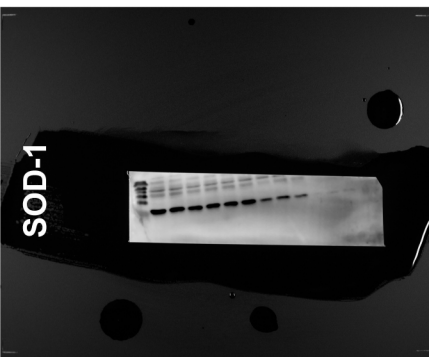

Figure 1 F

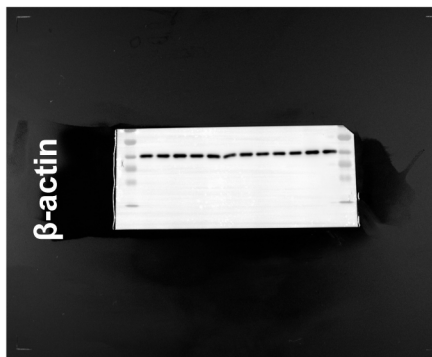

Figure 1 N

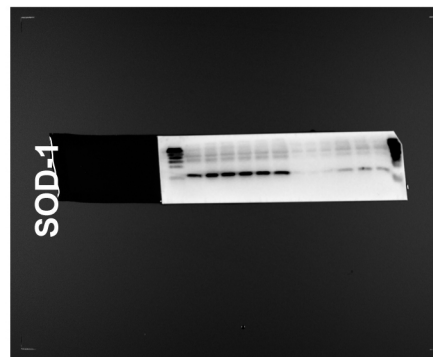

Figure 1 N

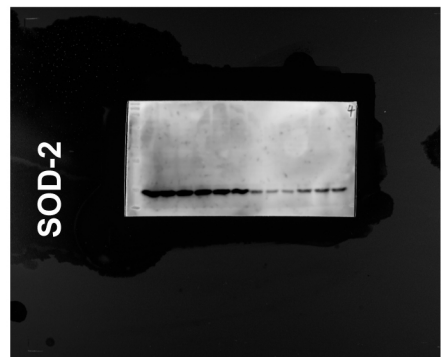

Figure 1 N

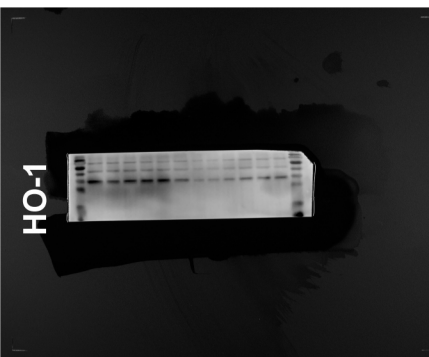

Figure 2 E

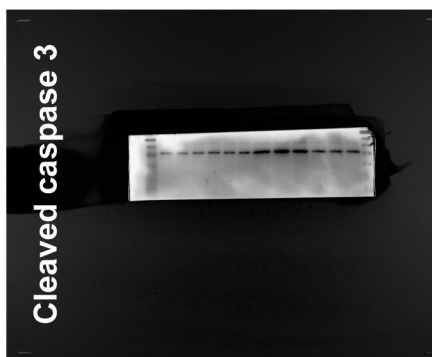

Figure 2 E

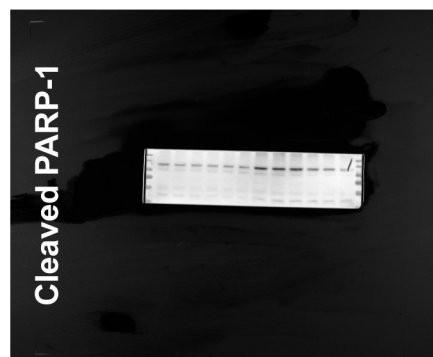

Figure 2 E

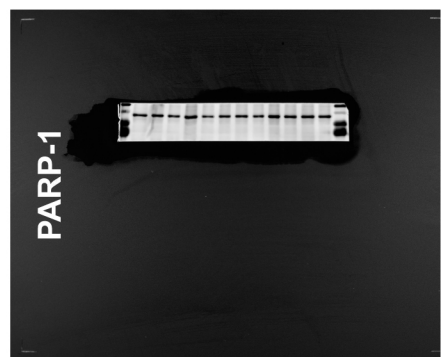

Figure 2 E

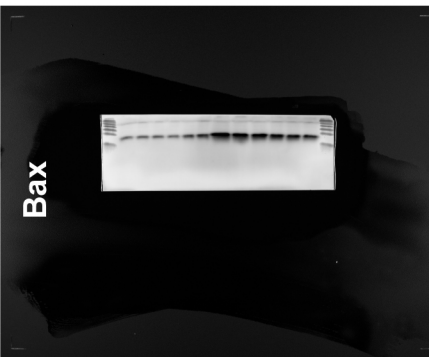

Figure 2 E

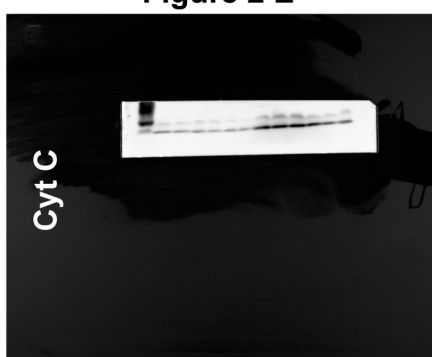

Figure 2 E

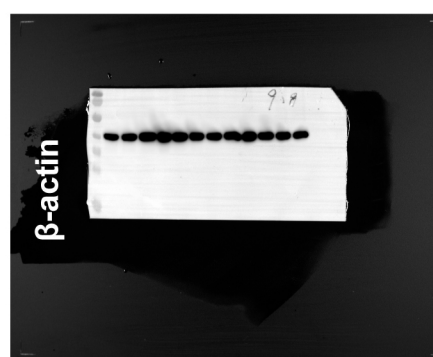

Figure 2 G

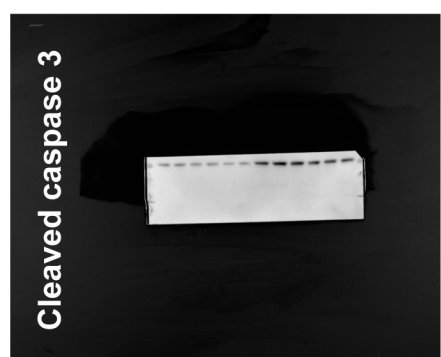

Figure 2 G

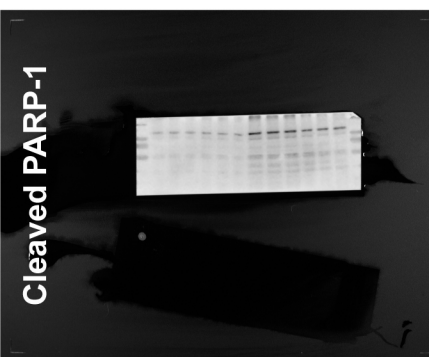

Figure 2 G

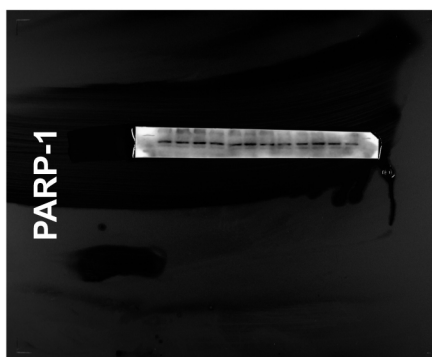

Figure 2 G

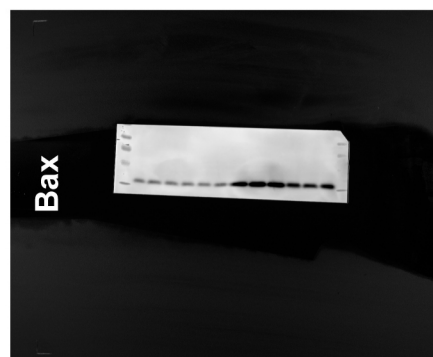

Figure 2 G

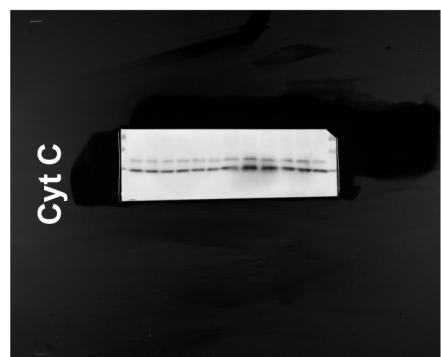

Figure 2 G

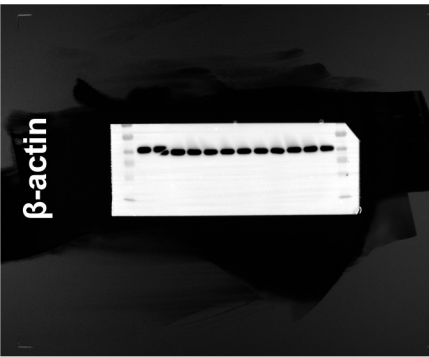

Figure 4 F

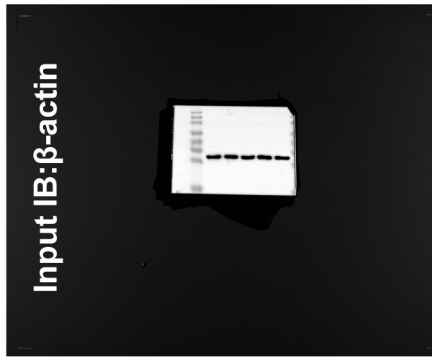

Supplement: f1 [file 9626703.f1.zip]
