# Supplementary material for: Pretreatment with Panaxatriol Saponin Attenuates Mitochondrial Apoptosis and Oxidative Stress to Facilitate Treatment of Myocardial Ischemia‐Reperfusion Injury via the Regulation of Keap1/Nrf2 Activity
Source: Hindawi journal article supplement (doi:10.1155/2022/9626703), 2022-01-01

Figure 4A

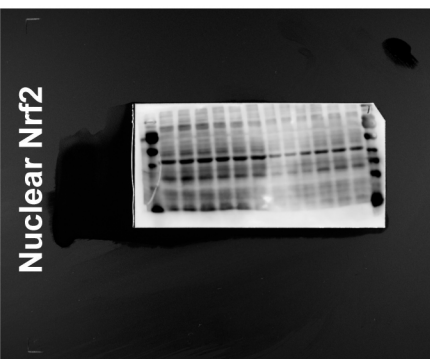

Figure 4A

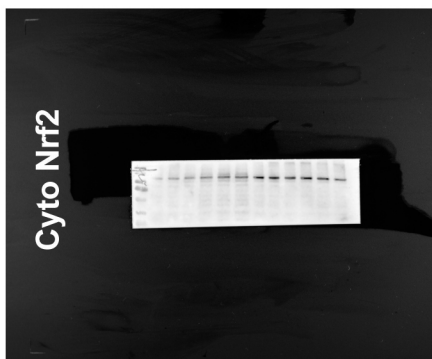

Figure 4A

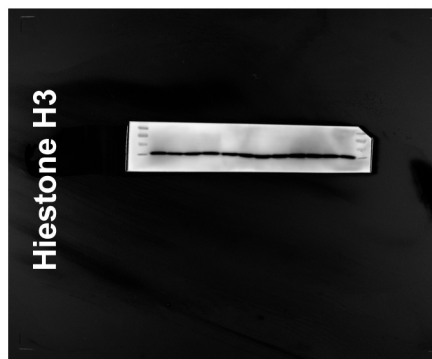

Figure 4A

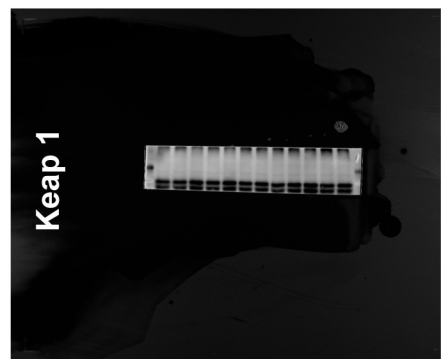

Figure 4A

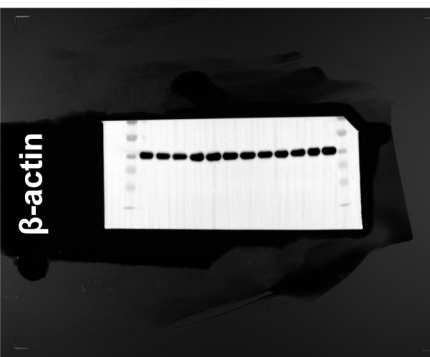

Figure 4F

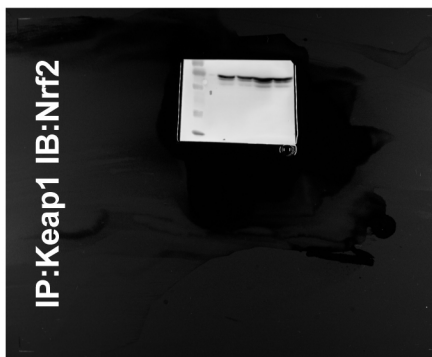

Figure 4F

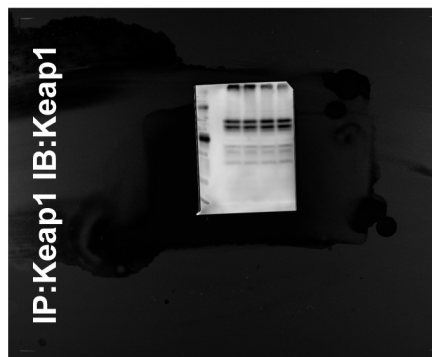

Figure 4F

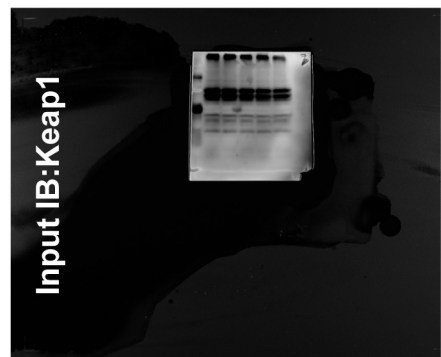

Figure 4G

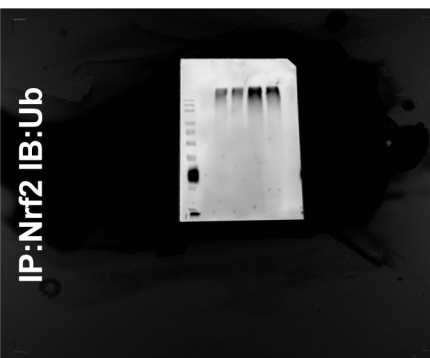

Figure 4G

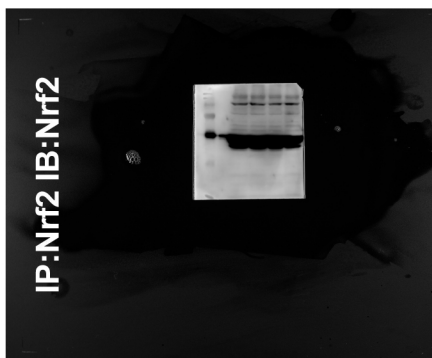

Figure 4G

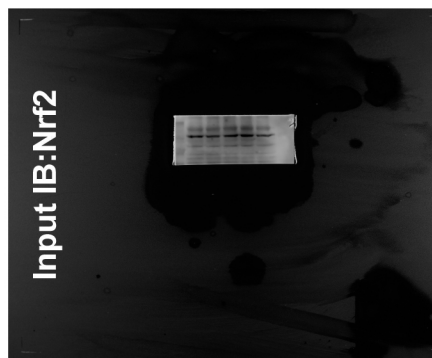

Figure 4G

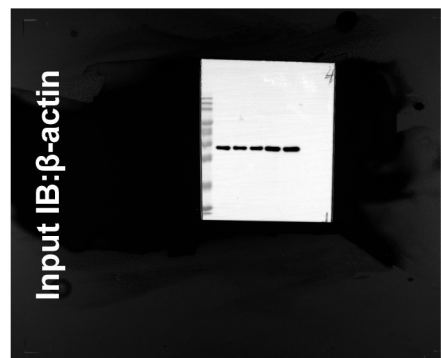

Figure 5A

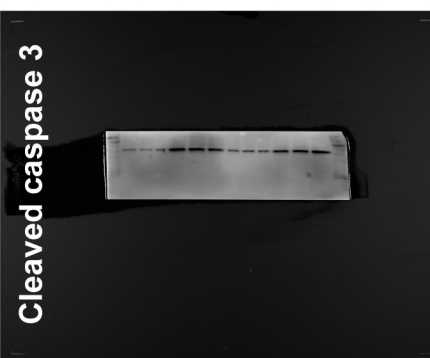

Figure 5A

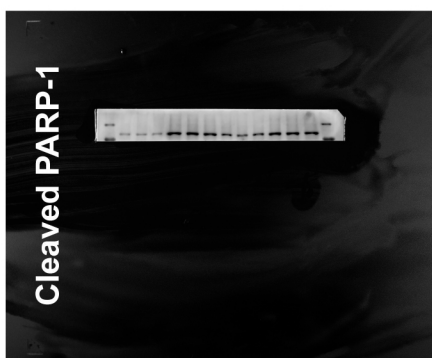

Figure 5A

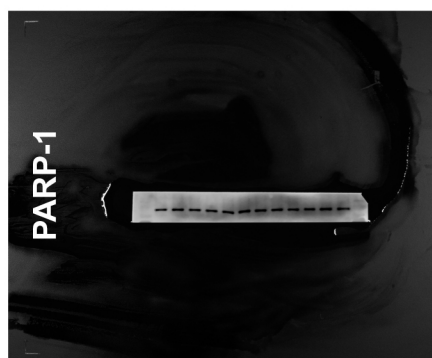

Figure 5A

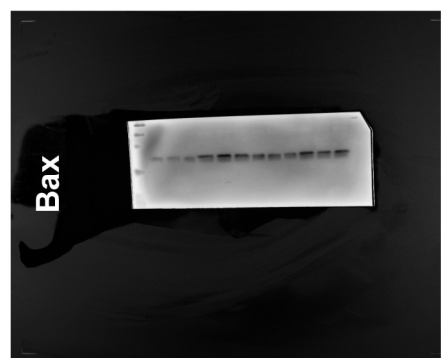

Figure 5A

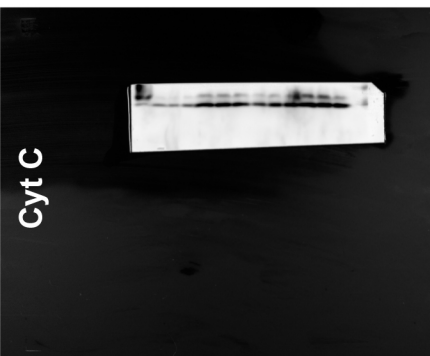

Figure 5A

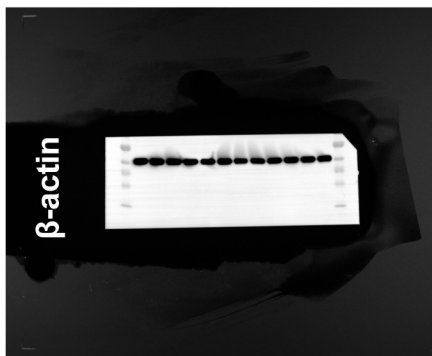

Figure 7C

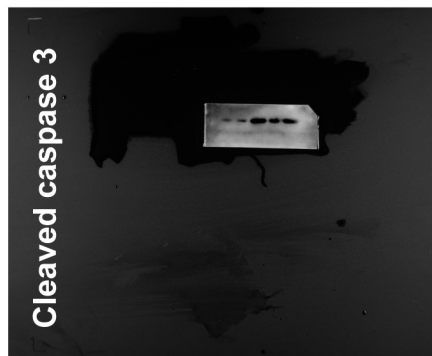

Figure 7C

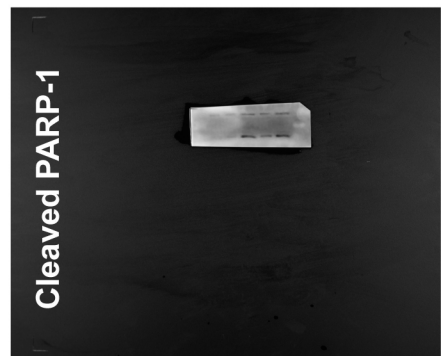

Figure 7C

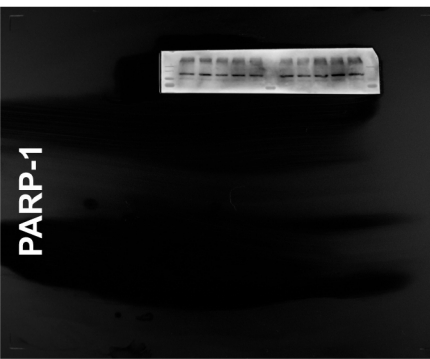

Figure 7C

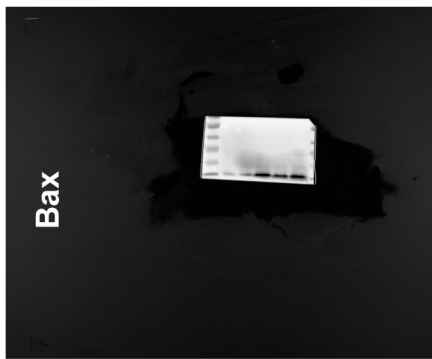

Figure 7C

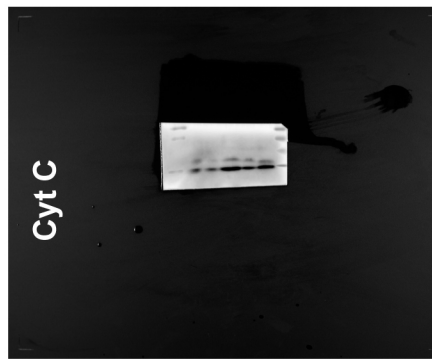

Figure 7C

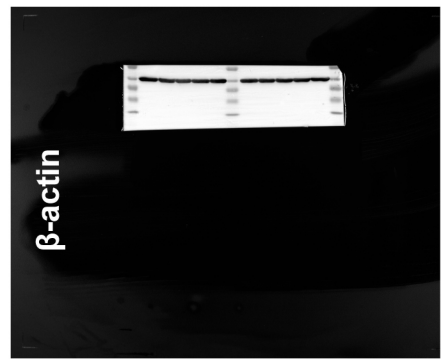

Supplement: f1 [file 9626703.f1.zip]
